# Supplementary material
Source: Springer Nature journal article supplement (https://www.springermedizin.de/resource/supplementary/13063_2014_2228_MOESM3_ESM.pdf/9621684)

**Eligibility criteria for screening**

Children 7-12 years  
Abdominal pain for at least 2 months and at least once per week  
Unexplained cause for abdominal pain

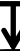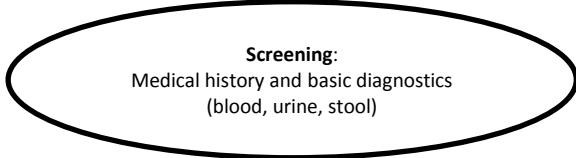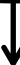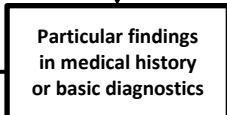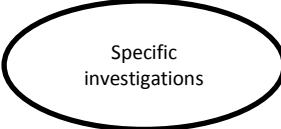

yes

no

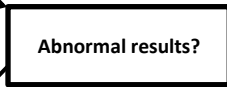

no

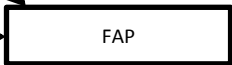

yes

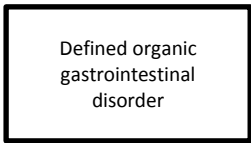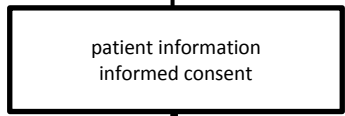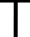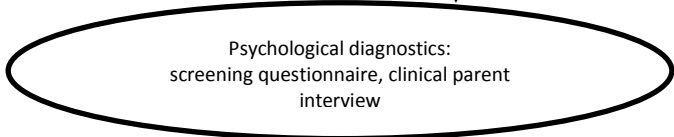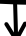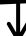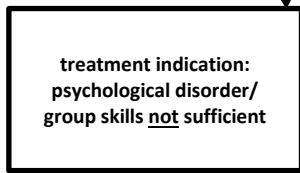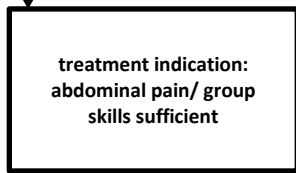

exclusion:  
individual treatment  
recommendation

inclusion:  
randomization list

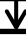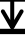

Supplement: MOESM3 [file 9621684]
